# Supplementary material for: Tb-MOF: a naked-eye and regenerable fluorescent probe for selective and quantitative detection of Fe3+and Al3+ions
Source: Royal Society of Chemistry journal article supplement (doi:10.1039/c6ra20359k), 2016-01-01
Supplement: c6ra20359k1.pdf [file c6ra20359k1.pdf]

## Supporting Information

### **Tb-MOF: A Naked-eye and Regenerable Fluorescent Probe for Selective and Quantitative Detection of Fe<sup>3+</sup> and Al<sup>3+</sup> Ions**

Mengfei Zhang, ‡<sup>a</sup> Jing Han, ‡<sup>a</sup> Haipeng Wu,<sup>a</sup> Qing Wei,<sup>\*a</sup> Gang Xie,<sup>a</sup> Sanping Chen,<sup>\*a</sup> Shengli Gao<sup>a</sup>

<sup>a</sup> *Key Laboratory of Synthetic and Natural Functional Molecule Chemistry of Ministry of Education, College of Chemistry and Materials Science, Northwest University, Xi'an 710127, P. R. China*

‡ *These authors contributed equally to this work.*

**Corresponding author**

**Prof. Sanping Chen**

**Tel.: +86-029-81535026**

**Fax: +86-029-81535026**

**E-mail: sanpingchen@126.com**

## Content of Table

**Fig. S1** FT-IR spectra of compound **1**.

**Fig. S2** The coordinated modes of TCA<sup>3-</sup> ligand in compound **1**.

**Fig. S3** Powder X-ray diffraction (PXRD) of simulated from the single-crystal data of **1** (black), as-synthesized compound **1** (blue), **1**+Fe<sup>3+</sup> (red) and **1**+Al<sup>3+</sup> (yellow).

**Fig. S4** Typical DSC and TG curves of compound **1**.

**Fig. S5** The UV/vis absorption spectra of the free ligand H<sub>3</sub>TCA and its corresponding compounds Tb-MOF were recorded in DMSO solution ( $c = 1 \times 10^{-5}$  M).

**Fig. S6** Solid-state excitation (purple line) and emission (blue line) spectra of compound **1**.

**Fig. S7** PXRD patterns of Tb-MOF: the simulated pattern from single crystal analysis, as-synthesized Tb-MOF and immersed in solution for 10 days.

**Fig. S8** Day to day fluorescence stability of compound **1** in aqueous solution.

**Fig. S9** Comparison of emission spectra of compound **1**, Tb<sup>3+</sup> and H<sub>3</sub>TCA (10<sup>-3</sup> M) under excitation at 375 nm.

**Fig. S10** Optimization of the solvent.

**Fig. S11** Optimization of the solvent ratio.

**Fig. S12** Comparison of the luminescence intensity at 549 nm of compound **1** in 10<sup>-3</sup> M different cations.

**Fig. S13** Comparison of the luminescence intensity at 463 nm of compound **1** in 10<sup>-3</sup> M different cations.

**Fig. S14** Photographs showing the visual color change of the Fe<sup>3+</sup> ions solution before (left) and after (right) adding compound **1**.

**Fig. S15** The visual change on the addition of various M(NO<sub>3</sub>)<sub>x</sub> under the fluorescent lamp (left), laboratory UV light (right,  $\lambda_{\text{ex}} = 375$  nm).

**Fig. S16** Comparison of the luminescence intensity of **1**+Fe<sup>3+</sup> with **1**+Fe<sup>3++</sup> different metal ions (10<sup>-4</sup> M) at 549 nm.

**Fig. S17** Comparison of the luminescence intensity of **1**+Al<sup>3+</sup> with **1**+Al<sup>3++</sup> different metal ions (10<sup>-4</sup> M) at 463 nm.

**Fig. S18** Fluorescence responses of Tb-MOF in aqueous solutions in the presence of various concentrations of Cu<sup>2+</sup>

**Fig. S19** Fluorescence responses of Tb-MOF in aqueous solutions in the presence of various concentrations of Fe<sup>3+</sup>

**Fig. S20** Low- (right) and high- magnification (left) TEM images of the products.

**Fig. S21** Low- (right) and high- magnification (left) SEM images of the products.

**Fig. S22** Comparison of the luminescence intensity of Tb<sup>3+</sup> under Fe<sup>3+</sup> (10<sup>-3</sup> M).

**Fig. S23** The luminescence intensity (549 nm) of one recycles (a) after the first recycle.

**Fig. S24** Comparison of the luminescence intensity of H<sub>3</sub>TCA and compound **1** under Al<sup>3+</sup> (10<sup>-3</sup> M).

**Table S1.** Crystal Data and Structure Refinement Summary for compound **1**.

**Table S2.** Selected Bond Lengths (Å) and Bond Angles (°) for compound **1**.

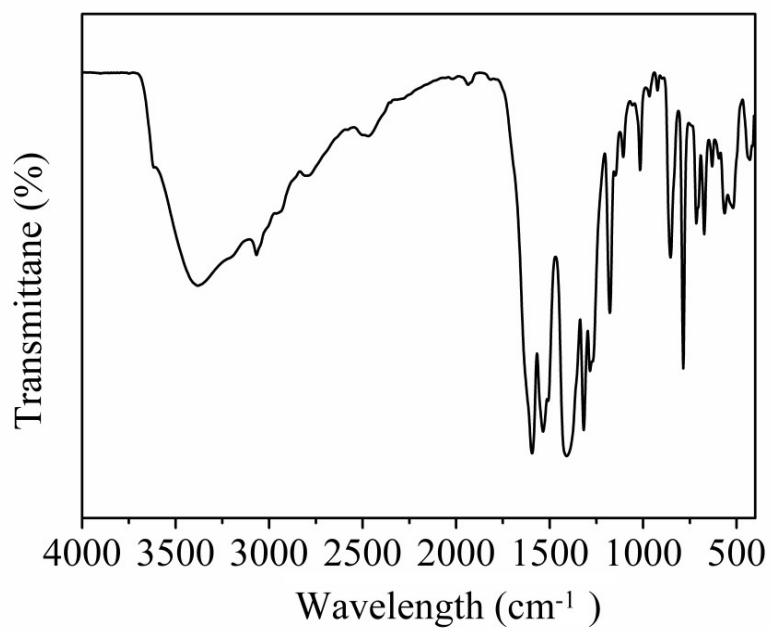

Fig. S1 FT-IR spectra of compound 1.

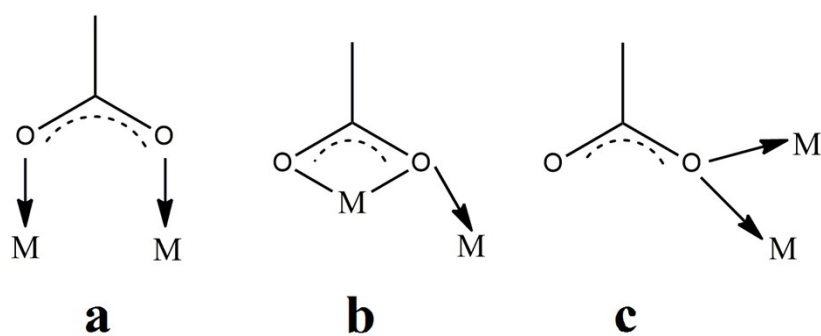

Fig. S2 The coordinated modes of TCA<sup>3-</sup> ligand in compound 1. a,  $\mu_2\text{-}\eta^1\text{:}\eta^1$ ; b,  $\mu_2\text{-}\eta^2\text{:}\eta^1$ ; c,  $\mu_2\text{-}\eta^2$ .

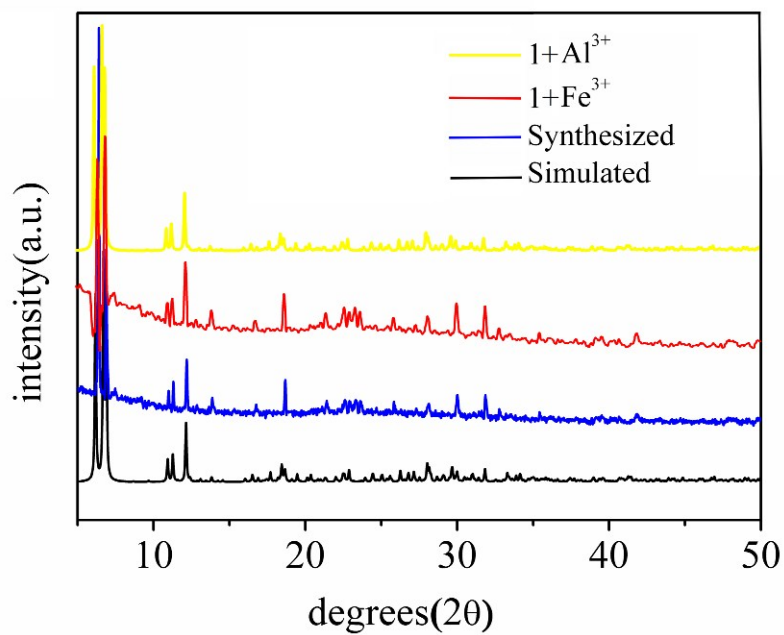

**Fig. S3** Powder X-ray diffraction (PXRD) of simulated from the single-crystal data of **1** (black), as-synthesized compound **1** (blue), **1+Fe<sup>3+</sup>** (red) and **1+Al<sup>3+</sup>** (yellow).

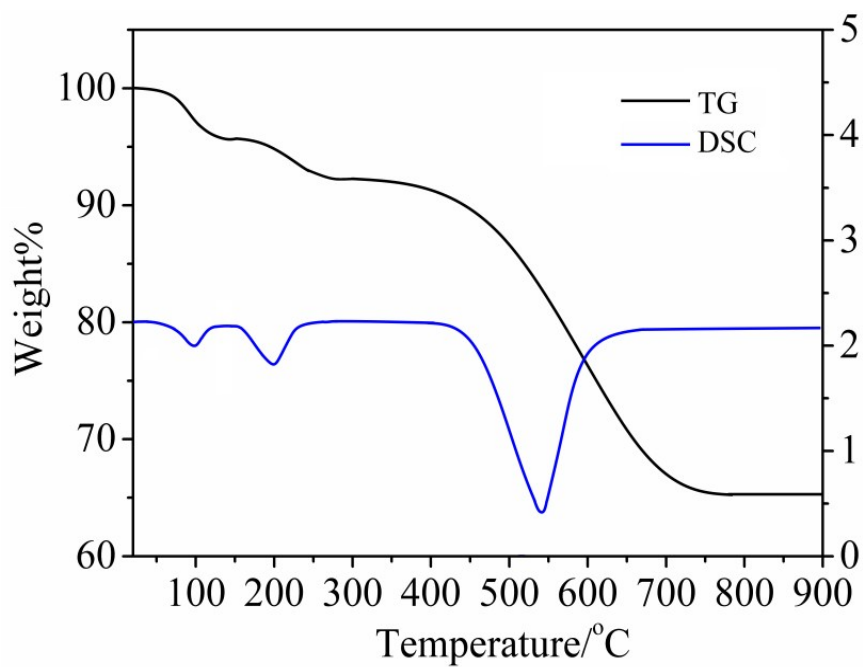

**Fig. S4** Typical DSC and TG curves of compound **1**.

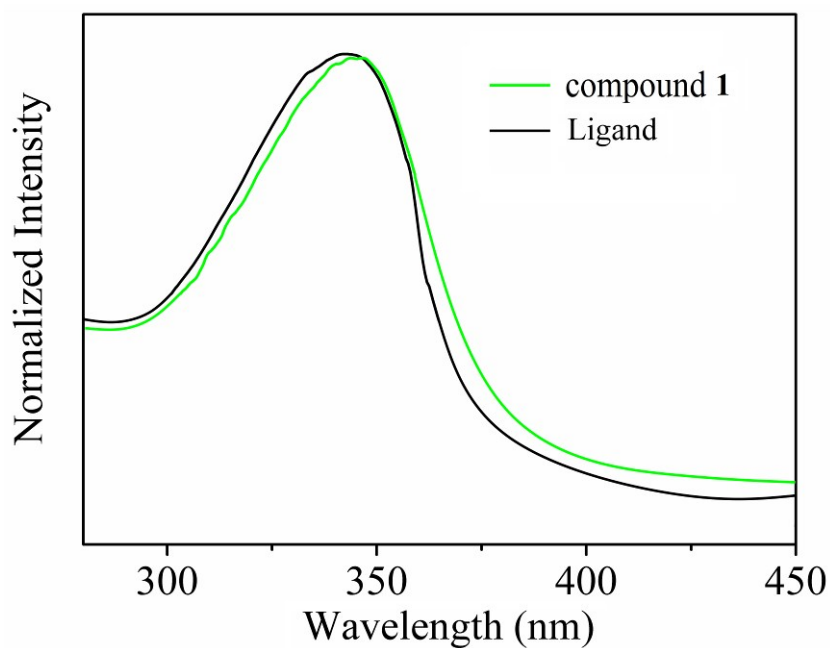

**Fig. S5** The UV/vis absorption spectra of the free ligand  $H_3TCA$  and its corresponding compounds Tb-MOF were recorded in  $CH_3OH$  solution ( $c = 1 \times 10^{-5}$  M).

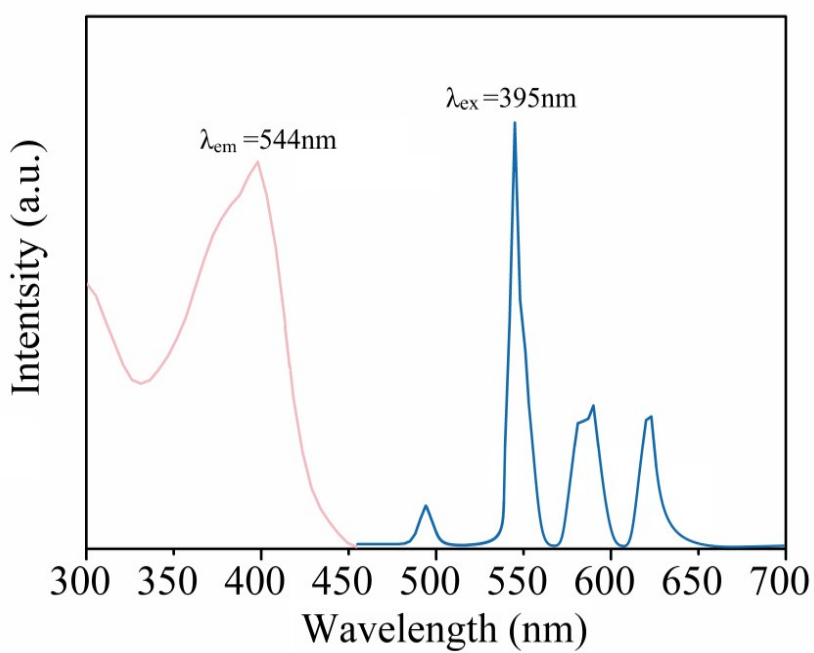

**Fig. S6** Solid-state excitation (purple line) and emission (blue line) spectra of compound **1**.

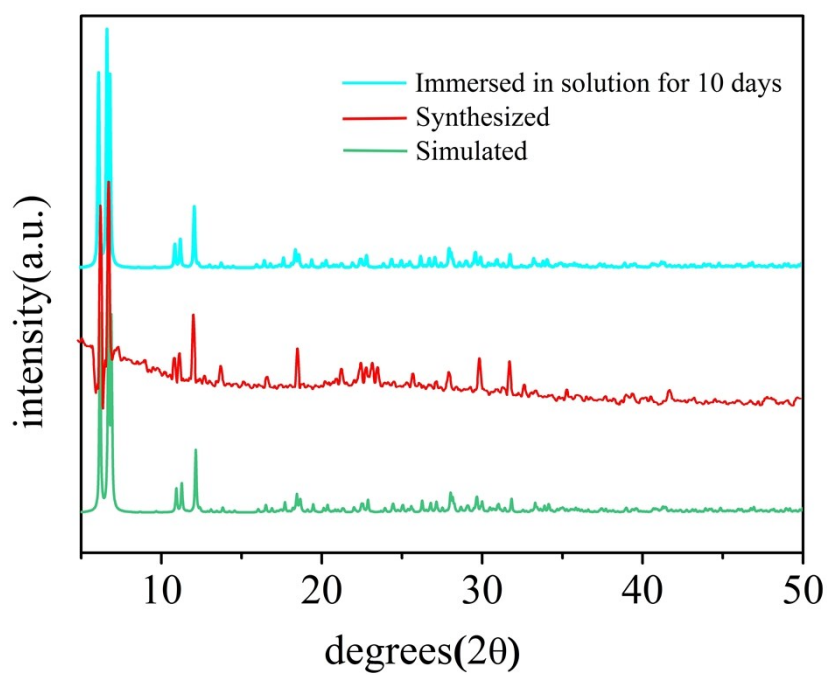

**Fig. S7** PXRD patterns of Tb-MOF: the simulated pattern from single crystal analysis, as-synthesized Tb-MOF and immersed in solution for 10 days.

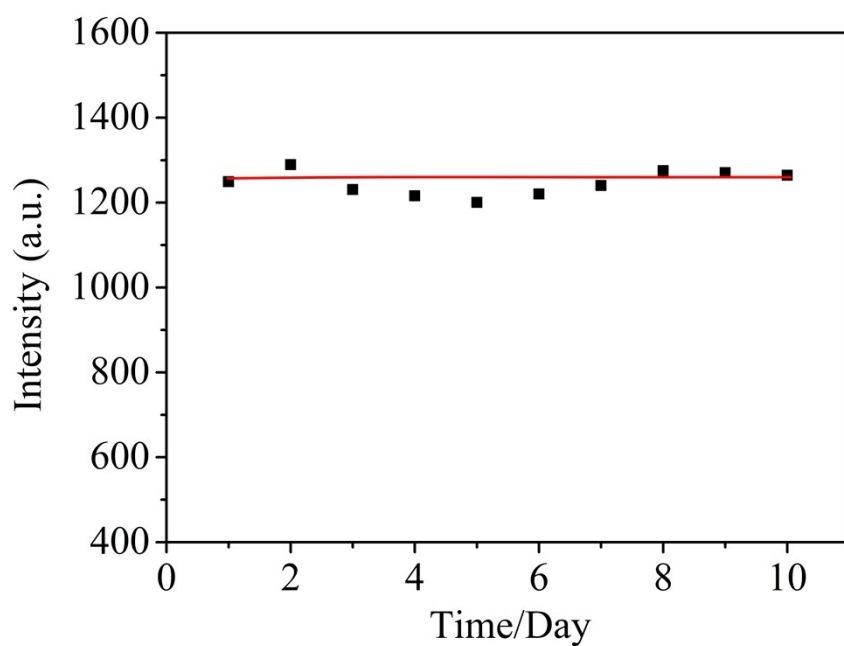

**Fig. S8** Day to day fluorescence stability of compound 1 in aqueous solution.

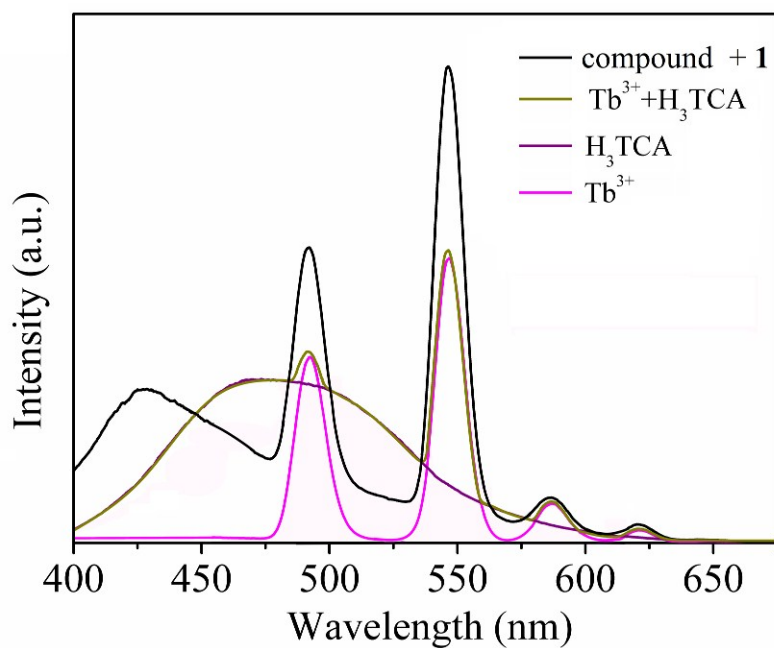

Fig. S8 Comparison of emission spectra of compound **1**,  $\text{Tb}^{3+}$  and  $\text{H}_3\text{TCA}$  ( $10^{-3}$  M) under excitation at 375 nm.

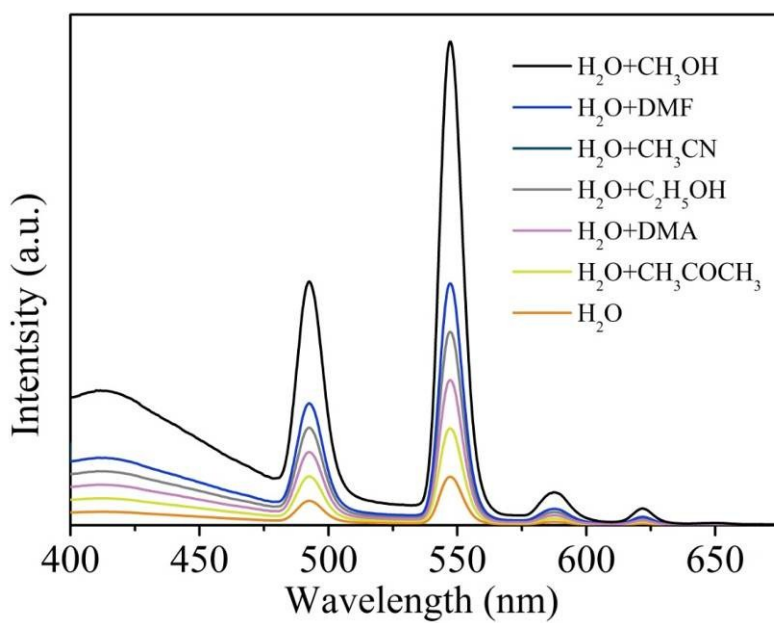

Fig. S10 Optimization of the solvent.

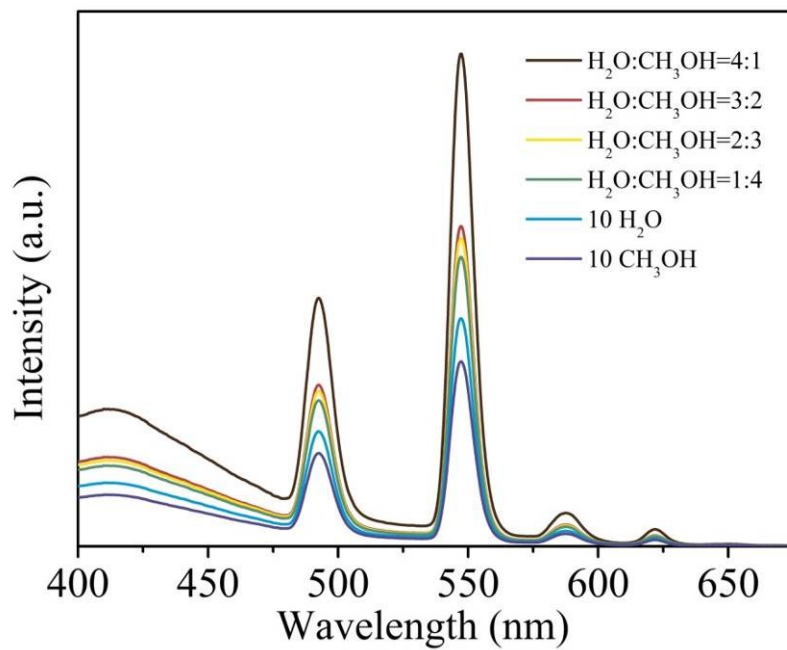

Fig. S11 Optimization of the solvent ratio.

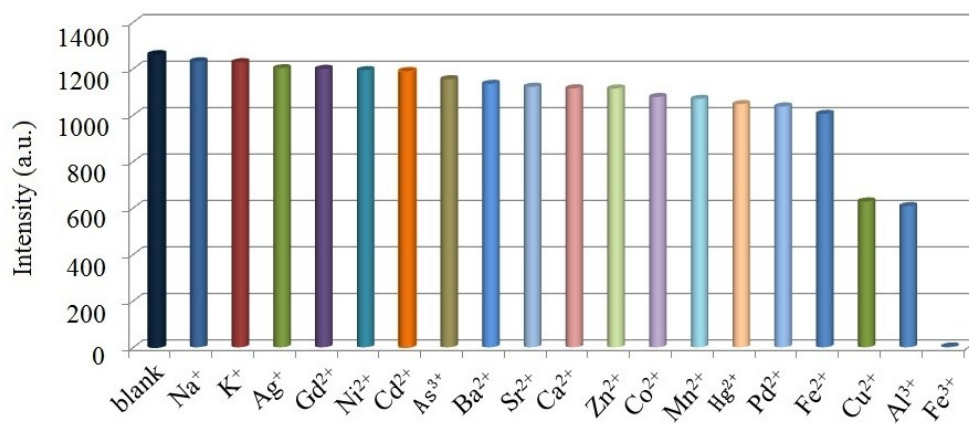

Fig. S12 Comparison of the luminescence intensity at 549 nm of compound **1** in  $10^{-3}$  M different cations.



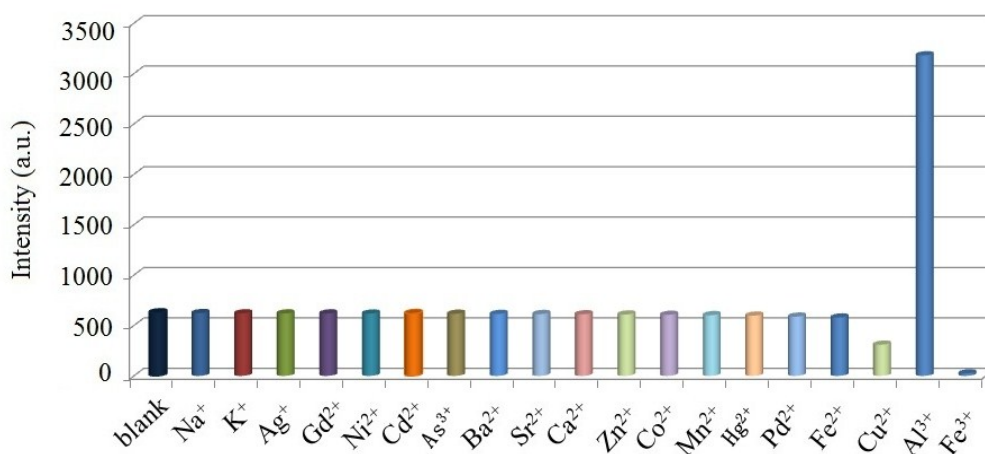

Fig. S13 Comparison of the luminescence intensity at 463 nm of compound **1** in  $10^{-3}$  M different cations.

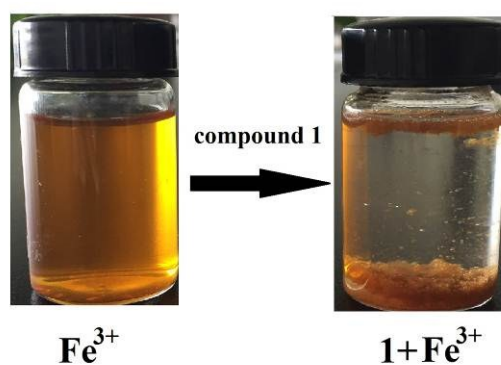

Fig. S14 Photographs showing the visual color change of the  $\text{Fe}^{3+}$  ions solution before (left) and after (right) add compound **1** about 12h.

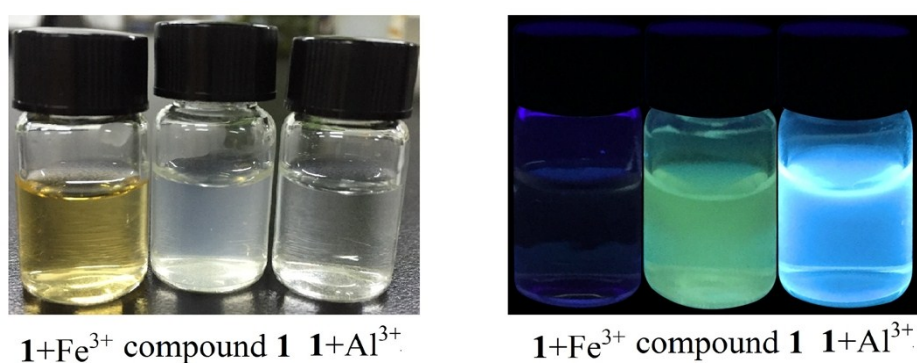

Fig. S15 The visual change on the addition of various  $\text{M}(\text{NO}_3)_x$  under the fluorescent lamp (left), laboratory UV light (right,  $\lambda_{\text{ex}} = 365$  nm).

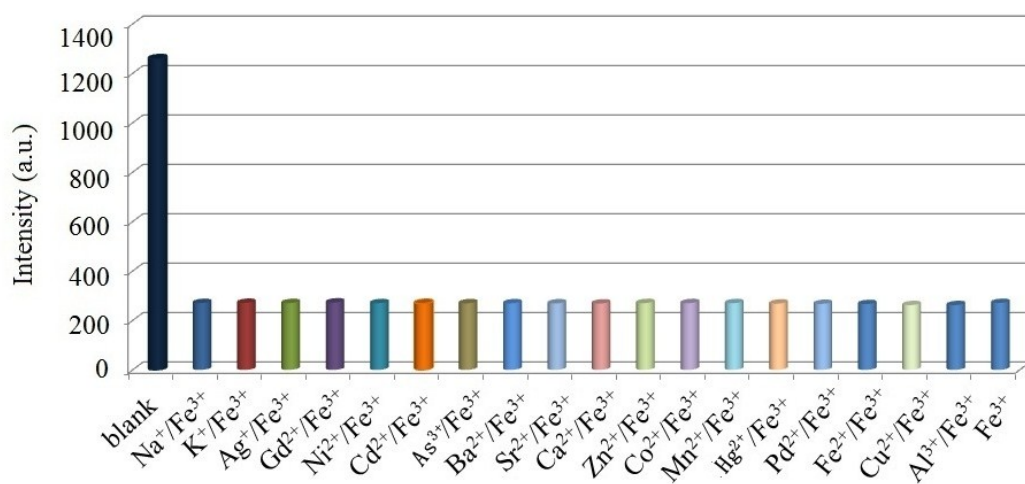

Fig. S16 Comparison of the luminescence intensity of 1+Fe<sup>3+</sup> with different metal ions at 549 nm (10<sup>-4</sup> M).

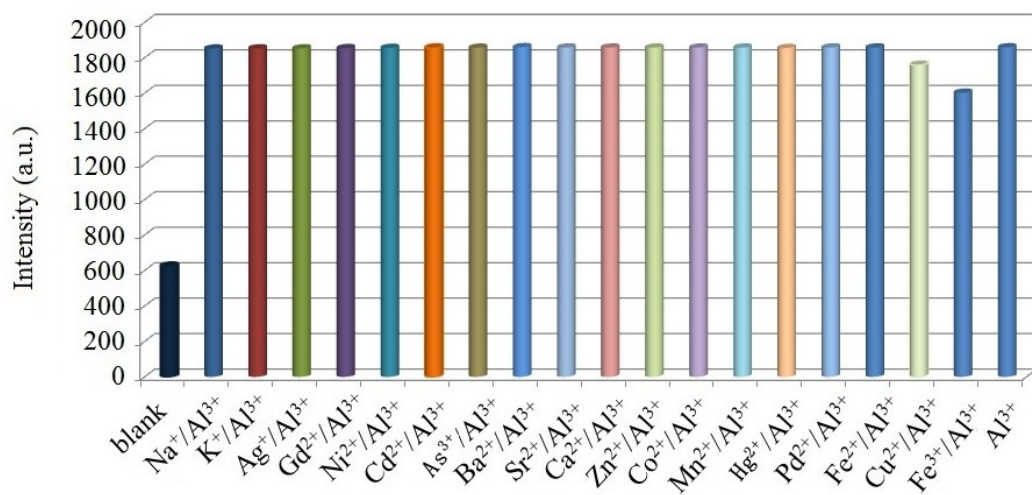

Fig. S17 Comparison of the luminescence intensity of 1+Al<sup>3+</sup> with different metal ions at 463 nm (10<sup>-4</sup> M).

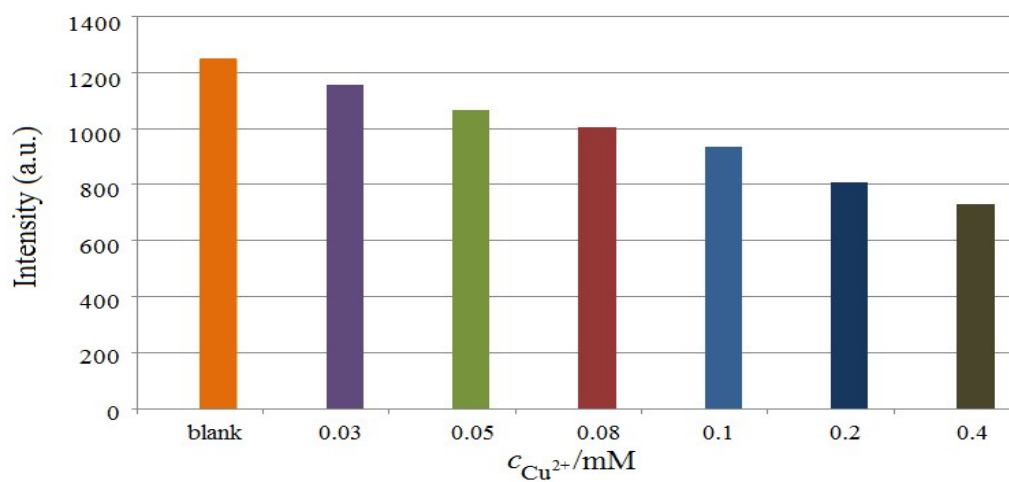

Fig. S18 Fluorescence responses of Tb-MOF in aqueous solutions in the presence of various concentrations of Cu<sup>2+</sup>.

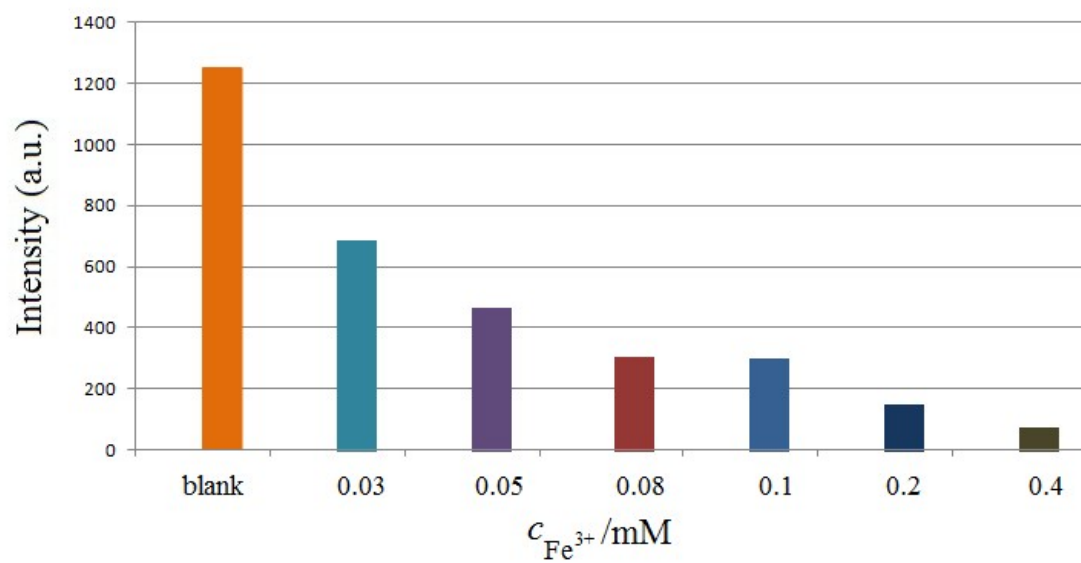

**Fig. S19** Fluorescence responses of Tb-MOF in aqueous solutions in the presence of various concentrations of  $\text{Fe}^{3+}$ .

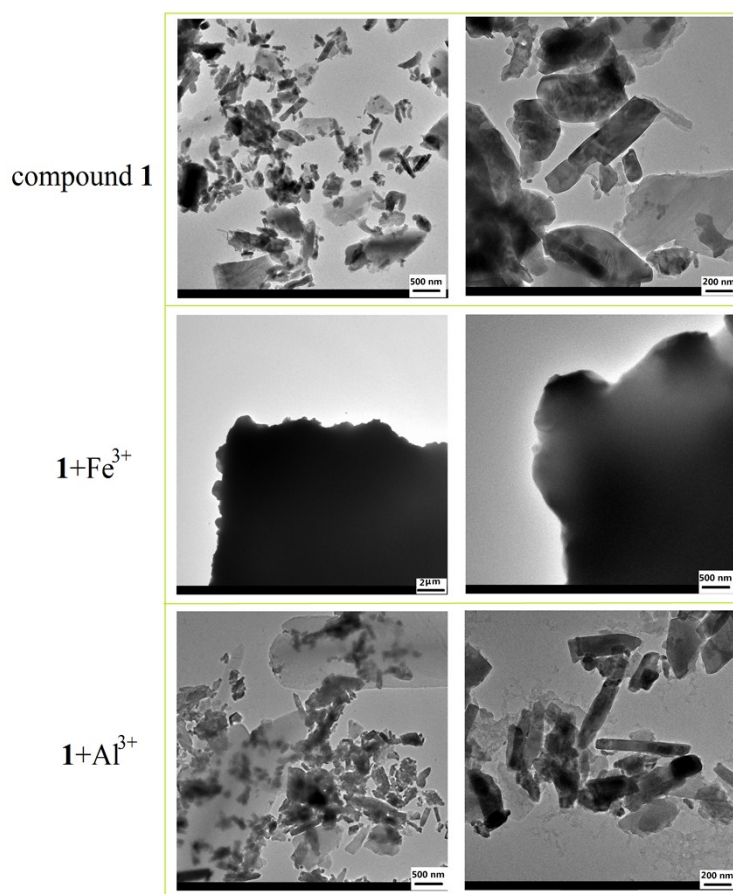

**Fig. S20** Low- (right) and high- magnification (left) TEM images of the products.

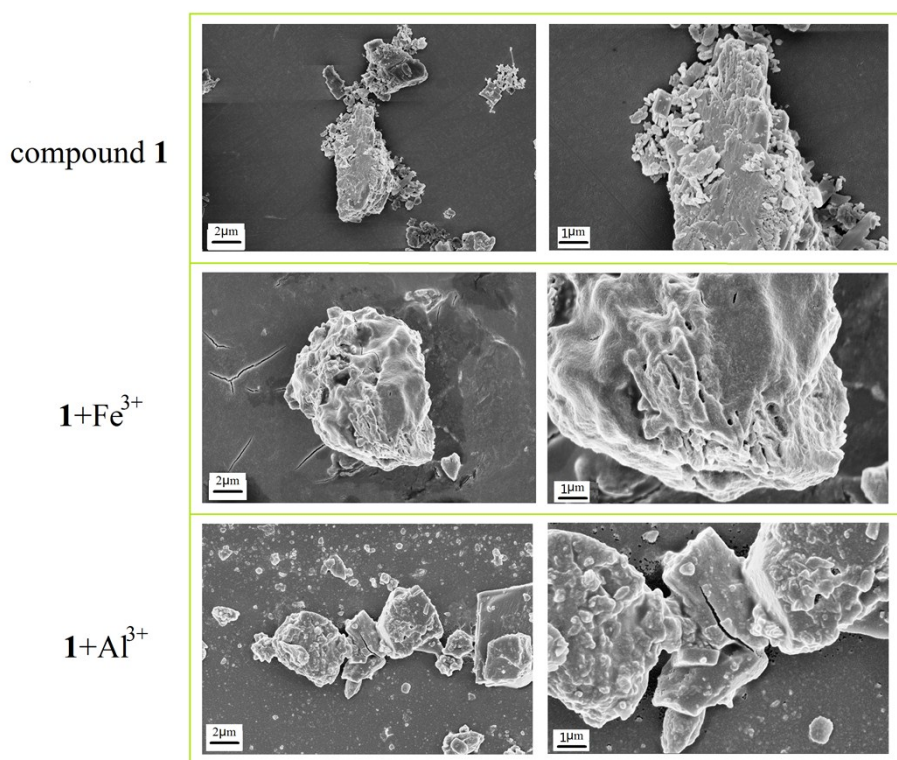

Fig. S21 Low- (right) and high- magnification (left) SEM images of the products.

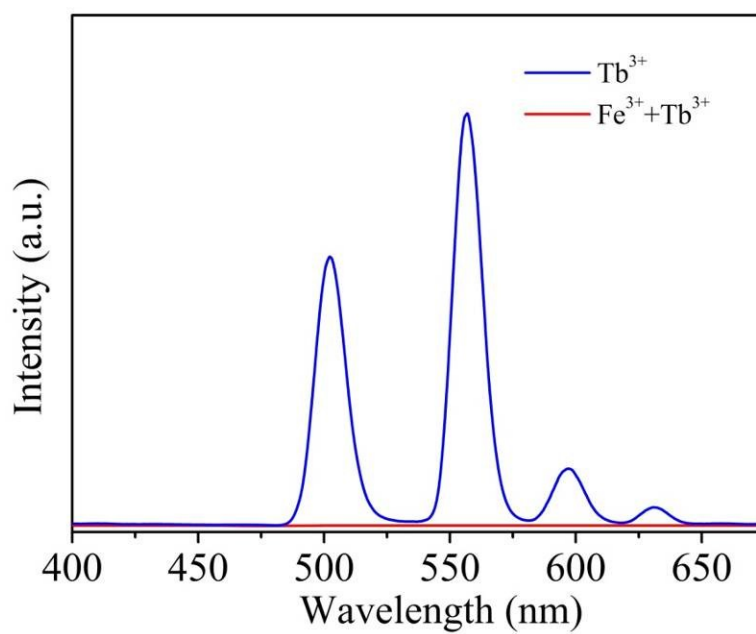

Fig. S22 Comparison of the luminescence intensity of  $Tb^{3+}$  under  $Fe^{3+}$  ( $10^{-3}$  M).

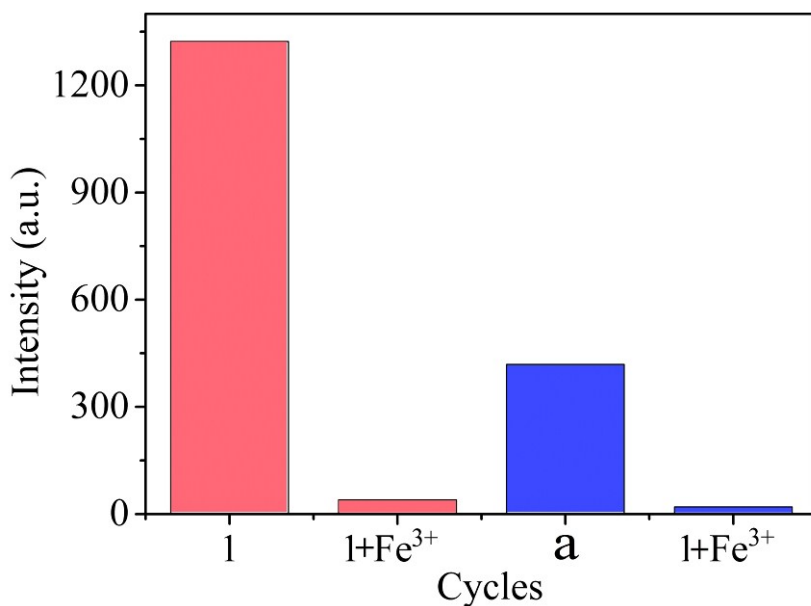

Fig. S23 The luminescence intensity (549 nm) of one recycles (a) after the first recycle.

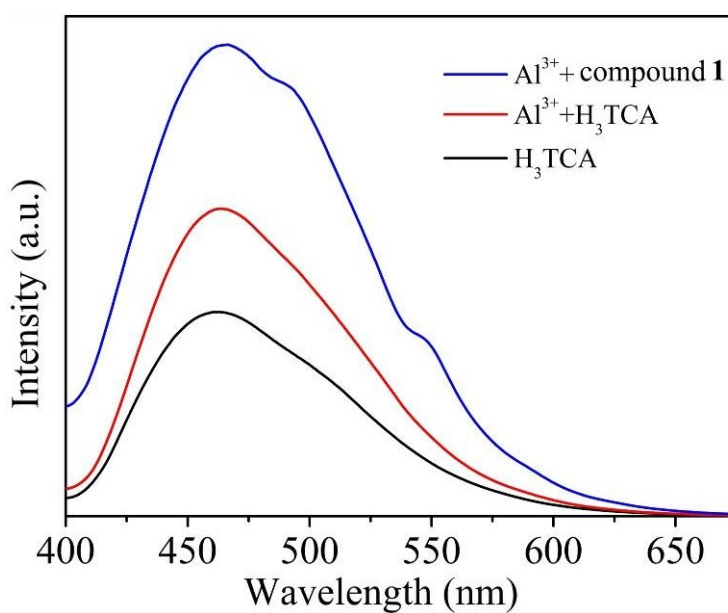

Fig. S24 Comparison of the luminescence intensity of H<sub>3</sub>TCA and compound 1 under Al<sup>3+</sup> (10<sup>-3</sup> M).

Table S1. Crystal Data and Structure Refinement Summary for compound 1.

|                   | [Tb <sub>3</sub> (TCA) <sub>2</sub> (DMA) <sub>0.5</sub> (OH) <sub>3</sub> (H <sub>2</sub> O) <sub>0.5</sub> ]•3H <sub>2</sub> O |
|-------------------|----------------------------------------------------------------------------------------------------------------------------------|
| Empirical formula | C <sub>44</sub> H <sub>38.5</sub> N <sub>2.5</sub> O <sub>19</sub> Tb <sub>3</sub>                                               |
| Formula weight    | 1329.02                                                                                                                          |
| Crystal system    | Monoclinic                                                                                                                       |
| space group       | C2/c                                                                                                                             |
| <i>a</i> (Å)      | 29.155(3)                                                                                                                        |
| <i>b</i> (Å)      | 11.0593(13)                                                                                                                      |
| <i>c</i> (Å)      | 31.580(5)                                                                                                                        |

|                                |                        |
|--------------------------------|------------------------|
| $\alpha$ (deg)                 | 90                     |
| $\beta$ (deg)                  | 115.607(2)             |
| $\gamma$ (deg)                 | 90                     |
| $V$ (Å <sup>3</sup> )          | 9182(2)                |
| $Z$                            | 8                      |
| $D_c$ (mg/m <sup>3</sup> )     | 1.923                  |
| $\mu$ (mm <sup>-1</sup> )      | 4.643 mm <sup>-1</sup> |
| $F(000)$                       | 5095                   |
| Reflections collected/unique   | 24948/9386             |
| $R(\text{int})$                | 0.0592                 |
| Data / restraints / parameters | 9386/42/623            |
| Goodness-of-fit on $F^2$       | 1.01                   |
| $R1^a$ [ $I > 2\sigma(I)$ ]    | 0.0422                 |
| $wR2^b$ (all data)             | 0.1097                 |

$$^aR_1 = \Sigma(F_o - F_c)/\Sigma F_o, \quad ^b wR_2 = [\Sigma w(F_o^2 - F_c^2)^2 / \Sigma w(F_o^2)^2]^{1/2a}$$

**Table S2.** Selected Bond Lengths (Å) and Bond Angles (o) for compound **1**.

|                                      |           |                                        |            |
|--------------------------------------|-----------|----------------------------------------|------------|
| Tb1-O1 <sup>3</sup>                  | 2.772(5)  | O14 <sup>2</sup> -Tb1-O5 <sup>4</sup>  | 156.01(18) |
| Tb1-O2 <sup>3</sup>                  | 2.427(5)  | O14 <sup>2</sup> -Tb1-O6 <sup>4</sup>  | 131.56(18) |
| Tb1-O3                               | 2.512(5)  | O14 <sup>2</sup> -Tb1-O9 <sup>1</sup>  | 99.59(17)  |
| Tb1-O4                               | 2.331(6)  | O15 <sup>2</sup> -Tb1-O1 <sup>3</sup>  | 131.27(16) |
| Tb1-O5 <sup>4</sup>                  | 2.443(6)  | O15 <sup>2</sup> -Tb1-O2 <sup>3</sup>  | 128.6(2)   |
| Tb1-O6 <sup>4</sup>                  | 2.427(6)  | O15 <sup>2</sup> -Tb1-O3               | 72.30(17)  |
| Tb1-O9 <sup>1</sup>                  | 2.404(5)  | O15 <sup>2</sup> -Tb1-O5 <sup>4</sup>  | 127.27(18) |
| Tb1-O14 <sup>2</sup>                 | 2.390(5)  | O15 <sup>2</sup> -Tb1-O6 <sup>4</sup>  | 138.94(19) |
| Tb1-O15 <sup>2</sup>                 | 2.349(5)  | O15 <sup>2</sup> -Tb1-O9 <sup>1</sup>  | 69.68(17)  |
| Tb2-O3 <sup>6</sup>                  | 2.389(5)  | O15 <sup>2</sup> -Tb1-O14 <sup>2</sup> | 66.67(17)  |
| Tb2-O5 <sup>7</sup>                  | 2.630(6)  | O3 <sup>5</sup> -Tb2-O5 <sup>7</sup>   | 62.15(18)  |
| Tb2-O8                               | 2.314(5)  | O3 <sup>5</sup> -Tb2-O9 <sup>8</sup>   | 81.14(18)  |
| Tb2-O9                               | 2.389(5)  | O3 <sup>5</sup> -Tb2-O9                | 77.22(17)  |
| Tb2-O9 <sup>8</sup>                  | 2.431(5)  | O3 <sup>5</sup> -Tb2-O10               | 80.3(2)    |
| Tb2-O10                              | 2.459(6)  | O3 <sup>5</sup> -Tb2-O13 <sup>7</sup>  | 134.79(17) |
| Tb2-O13 <sup>7</sup>                 | 2.910(6)  | O3 <sup>5</sup> -Tb2-O16 <sup>7</sup>  | 92.67(19)  |
| Tb2-O15 <sup>7</sup>                 | 2.349(5)  | O8-Tb2-O3 <sup>5</sup>                 | 128.71(19) |
| Tb2-O16 <sup>7</sup>                 | 2.413(6)  | O8-Tb2-O5 <sup>7</sup>                 | 66.60(18)  |
| Tb3-O1 <sup>7</sup>                  | 2.387(5)  | O8-Tb2-O9                              | 83.7(2)    |
| Tb3-O7 <sup>7</sup>                  | 2.304(5)  | O8-Tb2-O9 <sup>8</sup>                 | 133.38(19) |
| Tb3-O11 <sup>9</sup>                 | 2.372(6)  | O8-Tb2-O10                             | 140.8(2)   |
| Tb3-O1 <sup>3</sup>                  | 2.294(5)  | O8-Tb2-O13 <sup>7</sup>                | 70.75(19)  |
| Tb3-O14 <sup>10</sup>                | 2.389(5)  | O8-Tb2-O15 <sup>7</sup>                | 72.45(19)  |
| Tb3-O14                              | 2.357(5)  | O8-Tb2-O16 <sup>7</sup>                | 78.0(2)    |
| Tb3-O15                              | 2.325(5)  | O9 <sup>8</sup> -Tb2-O5 <sup>7</sup>   | 128.20(16) |
| O2 <sup>3</sup> -Tb1-O1 <sup>3</sup> | 49.70(17) | O9-Tb2-O5 <sup>7</sup>                 | 69.33(17)  |

---

|                                       |            |                                        |            |
|---------------------------------------|------------|----------------------------------------|------------|
| O2 <sup>3</sup> -Tb1-O3               | 136.63(18) | O9-Tb2-O9 <sup>8</sup>                 | 67.7(2)    |
| O2 <sup>3</sup> -Tb1-O5 <sup>4</sup>  | 76.2(2)    | O9 <sup>8</sup> -Tb2-O10               | 68.33(19)  |
| O2 <sup>3</sup> -Tb1-O6 <sup>4</sup>  | 92.4(2)    | O9-Tb2-O10                             | 133.0(2)   |
| O3-Tb1-O1 <sup>3</sup>                | 149.49(17) | O9 <sup>8</sup> -Tb2-O13 <sup>7</sup>  | 116.28(16) |
| O4-Tb1-O1 <sup>3</sup>                | 77.11(19)  | O9-Tb2-O13 <sup>7</sup>                | 147.36(16) |
| O4-Tb1-O2 <sup>3</sup>                | 126.3(2)   | O9-Tb2-O16 <sup>7</sup>                | 146.43(19) |
| O4-Tb1-O3                             | 92.21(19)  | O10-Tb2-O5 <sup>7</sup>                | 131.6(2)   |
| O4-Tb1-O5 <sup>4</sup>                | 127.82(19) | O10-Tb2-O13 <sup>7</sup>               | 70.14(19)  |
| O4-Tb1-O6 <sup>4</sup>                | 76.6(2)    | O15 <sup>7</sup> -Tb2-O3 <sup>5</sup>  | 149.56(19) |
| O4-Tb1-O9 <sup>1</sup>                | 148.0(2)   | O15 <sup>7</sup> -Tb2-O5 <sup>7</sup>  | 133.30(17) |
| O4-Tb1-O14 <sup>2</sup>               | 70.51(18)  | O15 <sup>7</sup> -Tb2-O9 <sup>8</sup>  | 69.21(17)  |
| O4-Tb1-O15 <sup>2</sup>               | 78.6(2)    | O15 <sup>7</sup> -Tb2-O9               | 85.10(17)  |
| O5 <sup>4</sup> -Tb1-O1 <sup>3</sup>  | 100.86(18) | O15 <sup>7</sup> -Tb2-O10              | 94.5(2)    |
| O5 <sup>4</sup> -Tb1-O3               | 63.24(18)  | O15 <sup>7</sup> -Tb2-O13 <sup>7</sup> | 68.33(16)  |
| O6 <sup>4</sup> -Tb1-O1 <sup>3</sup>  | 73.23(18)  | O16 <sup>7</sup> -Tb2-O5 <sup>7</sup>  | 77.60(19)  |
| O6 <sup>4</sup> -Tb1-O3               | 76.53(19)  | O16 <sup>7</sup> -Tb2-O9 <sup>8</sup>  | 143.01(18) |
| O6 <sup>4</sup> -Tb1-O5 <sup>4</sup>  | 54.06(18)  | O16 <sup>7</sup> -Tb2-O10              | 74.7(2)    |
| O9 <sup>1</sup> -Tb1-O1 <sup>3</sup>  | 127.72(16) | O16 <sup>7</sup> -Tb2-O13 <sup>7</sup> | 47.47(18)  |
| O9 <sup>1</sup> -Tb1-O2 <sup>3</sup>  | 74.64(16)  | O1 <sup>7</sup> -Tb3-O14 <sup>10</sup> | 72.19(19)  |
| O9 <sup>1</sup> -Tb1-O3               | 79.17(18)  | O7 <sup>7</sup> -Tb3-O17               | 80.47(19)  |
| O9 <sup>1</sup> -Tb1-O5 <sup>4</sup>  | 72.37(18)  | O7 <sup>7</sup> -Tb3-O1 <sup>19</sup>  | 78.4(2)    |
| O9 <sup>1</sup> -Tb1-O6 <sup>4</sup>  | 126.10(18) | O7 <sup>7</sup> -Tb3-O14               | 143.03(18) |
| O14 <sup>2</sup> -Tb1-O1 <sup>3</sup> | 65.59(17)  | O7 <sup>7</sup> -Tb3-O14 <sup>10</sup> | 136.15(18) |
| O14 <sup>2</sup> -Tb1-O2 <sup>3</sup> | 80.1(2)    | O7 <sup>7</sup> -Tb3-O15               | 76.57(19)  |
| O14 <sup>2</sup> -Tb1-O3              | 137.72(18) |                                        |            |

---
